# Supplementary material for: Nutritional Composition and Microbial Communities of Two Non-alcoholic Traditional Fermented Beverages from Zambia: A Study of Mabisi and Munkoyo
Source: PubMed Central journal article supplement (PMC7352844; doi:10.3390/nu12061628), 2020-06-01
Supplement: nutrients-12-01628-s001.pdf [file nutrients-12-01628-s001.pdf]

**Supplementary Table 1.** Statistical analysis of differences in mean between measures for *Mabisi* and *Munkoyo* of nutritional parameters measured and pH (see Tables 1 and 2 in main text).

| <b>Parameter</b>      | <b>Mabisi<br/>mean (SD)</b> | <b>Munkoyo<br/>mean (SD)</b> | <b>t-value</b> | <b>Degrees of<br/>freedom<br/>(df)</b> | <b>P-value</b> |
|-----------------------|-----------------------------|------------------------------|----------------|----------------------------------------|----------------|
| Moisture              | 85.34 %<br>(3.61)           | 93.56 % (2.24)               | -4.043         | 23                                     | 0.001          |
| Dry Weight            | 14.67 %<br>(1.81)           | 6.20 % (2.28)                | -4.8           | 23                                     | <0.001         |
| Ash                   | 0.67 %<br>(0.047)           | 0.12 % (0.046)               | 21.765         | 23                                     | <0.001         |
| Fibre                 | 0                           | 0.62 % (0.124)               |                |                                        |                |
| Crude Protein         | 3.87 %<br>(0.786)           | 0.36 % (0.175)               | 14.65          | 23                                     | <0.001         |
| Crude Fat             | 4.06 %<br>(1.053)           | 0.84 % (0.262)               | 12.52          | 23                                     | <0.001         |
| Total<br>Carbohydrate | 6.07 % (6.57)               | 4.51 % (2.23)                | 2.884          | 23                                     | 0.008          |
| Energy                | 76.28 %<br>(31.901)         | 26.99 % (9.61)               | 8.123          | 23                                     | <0.001         |
| pH                    | 4.12 % (0.17)               | 3.16 % (0.17)                | 14.392         | 23                                     | <0.001         |
| Vitamin B1            | 0.04 mg/100g<br>(0.015)     | 0.036 mg/100g<br>(0.019)     | 0.592          | 23                                     | 0.592          |
| Vitamin B2            | 0.132<br>mg/100g<br>(0.014) | 0.038 mg/100g<br>(0.01)      | 19.271         | 23                                     | <0.001         |
| Vitamin B3            | 0.329<br>mg/100g<br>(0.136) | 0.229 mg/100g<br>(0.127)     | 1.906          | 23                                     | 0.069          |
| Vitamin B6            | 0.022<br>mg/100g<br>(0.005) | 0.016 mg/100g<br>(0.010)     | 1.865          | 23                                     | 0.075          |
| Vitamin B12           | 0.394<br>µg/100g<br>(0.077) | 0                            |                |                                        |                |
| Calcium               | 98.5 mg/100g<br>(17.4)      | 3.654 mg/100g<br>(2.106)     | 19.481         | 23                                     | <0.001         |
| Iron                  | 0.188<br>mg/100g<br>(0.154) | 0.045 mg/100g<br>(0.034)     | 3.076          | 23                                     | 0.005          |
| Zinc                  | 0.675<br>mg/100g<br>(0.110) | 0.274 mg/100g<br>(0.062)     | 11.33          | 23                                     | <0.001         |

**Supplementary Table 2.** Variation accounted for by the different nutritional parameters (in rotated space by Varimax with Kaiser Normalization)<sup>a</sup>. Principal Components 1 and 2 are shown with loadings of the nutritional parameters contribution to the respective components. Component 2 variation in the samples is explained by vitamins B1 and B6. Explain that loadings have a value between -1 and +1, zero being the average of all observations.

|                    | <b>Rotated Component Loadings<sup>a</sup></b> |          |
|--------------------|-----------------------------------------------|----------|
|                    | <b>Components</b>                             |          |
|                    | <b>1</b>                                      | <b>2</b> |
| Ash                | 0.957                                         |          |
| Vitamin B12        | 0.944                                         |          |
| Crude fat          | 0.944                                         |          |
| Vitamin B2         | 0.942                                         |          |
| pH                 | 0.941                                         |          |
| Energy             | 0.936                                         |          |
| Ca                 | 0.936                                         |          |
| Crude protein      | 0.921                                         |          |
| Zn                 | 0.911                                         |          |
| Moisture           | -0.813                                        |          |
| Total Carbohydrate | 0.762                                         |          |
| Fe                 | 0.708                                         |          |
| Vitamin B3         | 0.353                                         | -0.283   |
| Vitamin B6         |                                               | 0.875    |
| Vitamin B1         |                                               | 0.865    |

Variable Principal Normalization. *a.* Rotation Method: Varimax with Kaiser Normalization.

**Supplementary Table 3.** Results of microbial community diversity analysis of traditional fermented foods *Mabisi* (MA) and *Munkoyo* (MU): alpha diversity measures (at highest sampling rarefaction of 15000 sequences per samples) for each sample based on Chao1 and Faith's Phylogenetic Diversity (PD).

| Sample ID | <i>Mabisi</i> |                                | <i>Munkoyo</i> |                                |     |
|-----------|---------------|--------------------------------|----------------|--------------------------------|-----|
|           | Chao1         | Faith's Phylogenetic Diversity | Sample ID      | Faith's Phylogenetic Diversity |     |
| MA1       | 309.2         | 2.9                            | MU1            | 148.4                          | 2.4 |
| MA2       | 470.4         | 2.8                            | MU2            | 142.4                          | 2.2 |
| MA3       | 206.2         | 2.3                            | MU3            | 103.8                          | 2.0 |
| MA4       | 339.1         | 3.4                            | MU4            | 155.5                          | 2.0 |
| MA5       | 471.1         | 3.2                            | MU5            | 98.9                           | 2.0 |
| MA6       | 262.4         | 2.4                            | MU6            | 197.1                          | 3.4 |
| MA7       | 357.0         | 2.6                            | MU7            | 85.8                           | 2.1 |
| MA8       | 185.9         | 1.7                            | MU8            | 140.2                          | 2.4 |
| MA9       | 341.3         | 2.6                            | MU9            | 88.0                           | 3.9 |
| MA10      | 289.8         | 2.5                            | MU10           | 223.1                          | 2.9 |
| MA11      | 283.5         | 2.3                            | MU11           | 95.5                           | 2.3 |
| MA12      | 311.5         | 2.6                            | MU12           | 117.1                          | 2.2 |
|           |               |                                | MU13           | 208.3                          | 2.7 |
